# Supplementary figures and images for: Spectroscopic properties of GdxLa1−xAlO3nanocrystals doped with Pr3+ions
Source: Royal Society of Chemistry journal article supplement (doi:10.1039/c9nj00264b), 2019-01-01

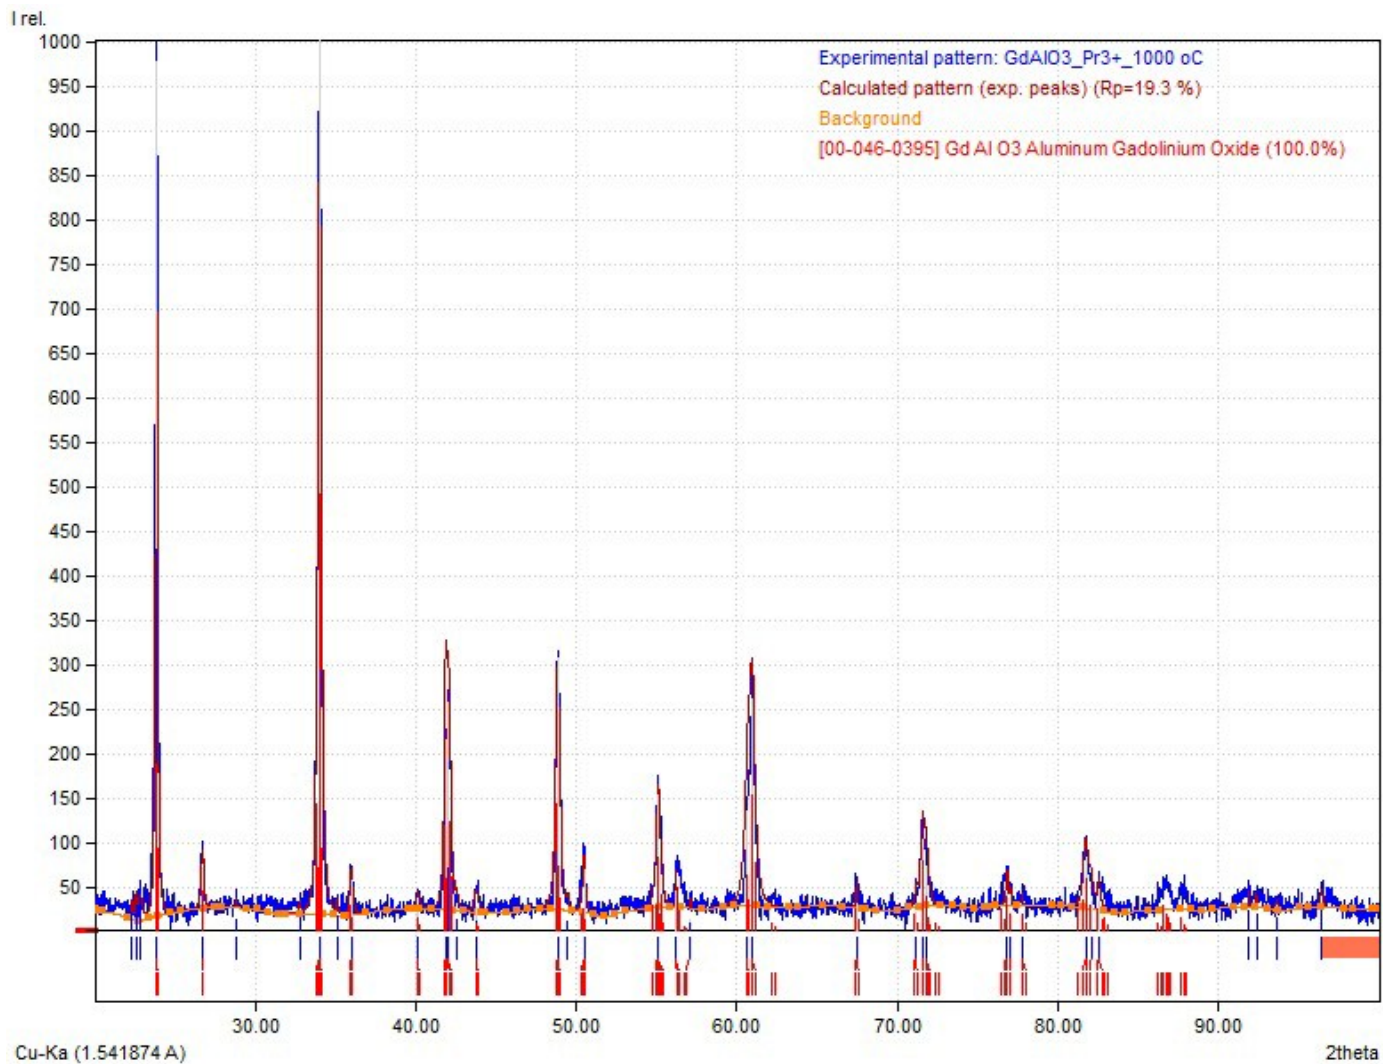

Supplement: c9nj00264b1.pdf [file c9nj00264b1.pdf]
